# Supplementary material for: Predictors of future suicide attempt among adolescents with suicidal thoughts or non-suicidal self-harm: a population-based birth cohort study
Source: PubMed Central journal article supplement (PMC6494973; doi:10.1016/s2215-0366(19)30030-6), 2019-04
Supplement: mmc1.pdf [file mmc1.pdf]

# THE LANCET Psychiatry

## Supplementary appendix

This appendix formed part of the original submission and has been peer reviewed. We post it as supplied by the authors.

Supplement to: Mars B, Heron J, Klonsky ED, et al. Predictors of future suicide attempt among adolescents with suicidal thoughts or non-suicidal self-harm: a population-based birth cohort study. *Lancet Psychiatry* 2019; published online March 14. [http://dx.doi.org/10.1016/S2215-0366\(19\)30030-6](http://dx.doi.org/10.1016/S2215-0366(19)30030-6).

eTable 1: Comparison of those with complete and incomplete data on suicide attempts at 21 years (Comparison amongst those with suicidal thoughts at baseline,  $N=456$ )

eTable 2: Comparison of those with complete and incomplete data on suicide attempts at 21 years (Comparison amongst those with non-suicidal self-harm at baseline,  $N=569$ )

eTable 3 Comparison of responders and non-responders to the self-harm questionnaire at 16 years by key demographic variables (Comparison amongst those invited to participate in the age 16 year questionnaire,  $N=9,370$ )

eTable 4: Predictors of incident suicide attempts amongst those with suicidal thoughts at baseline: Comparison of complete case and imputed data

eTable 5: Predictors of incident suicide attempts amongst those with non-suicidal self-harm at baseline: Comparison of complete case and imputed data

eTable 6: Description of risk factors in the subsample with no suicidal thoughts or attempts at age 16 years

eTable 7: Predictors of incident suicide attempts amongst those with non-suicidal self-harm at baseline: Sensitivity analysis removing those who reported having self-poisoned on the most recent self-harm occasion

**eTable 1: Comparison of those with complete and incomplete data on suicide attempts at 21 years (Comparison amongst those with suicidal thoughts at baseline, N=456)**

| Variable                        | Description              | N   | Complete data on suicide attempts n=310 | Incomplete data on suicide attempts n=146 | P value <sup>a</sup> |
|---------------------------------|--------------------------|-----|-----------------------------------------|-------------------------------------------|----------------------|
| Child sex                       | Male                     | 123 | 80 (25.8%)                              | 43 (29.5%)                                | 0.413                |
|                                 | Female                   | 333 | 230 (74.2%)                             | 103 (70.6%)                               |                      |
| Parity                          | First born               | 199 | 131 (43.0%)                             | 68(48.9%)                                 | 0.384                |
|                                 | Second born              | 171 | 119 (39.0%)                             | 52 (37.4%)                                |                      |
|                                 | Third born plus          | 74  | 55 (18.0%)                              | 19 (13.7%)                                |                      |
| Home overcrowding               | ≤1 person/room           | 424 | 293 (97.7%)                             | 131(94.9%)                                | 0.130                |
|                                 | >1 person/room           | 14  | 7 (2.3%)                                | 7 (5.1%)                                  |                      |
| Maternal education              | Degree                   | 94  | 69 (22.3%)                              | 25 (18.5%)                                | 0.377                |
|                                 | A level                  | 121 | 89 (28.8%)                              | 32 (23.7%)                                |                      |
|                                 | O level                  | 150 | 100 (32.4%)                             | 50 (37.0%)                                |                      |
|                                 | < O level                | 79  | 51 (16.5%)                              | 28 (20.7%)                                |                      |
| Equivalentised household income | 1 <sup>st</sup> quintile | 104 | 71 (25.0%)                              | 33 (25.0%)                                | 0.114                |
|                                 | 2 <sup>nd</sup> quintile | 94  | 72 (25.4%)                              | 22 (16.7%)                                |                      |
|                                 | 3 <sup>rd</sup> quintile | 89  | 62 (21.8%)                              | 27 (20.5%)                                |                      |
|                                 | 4 <sup>th</sup> quintile | 70  | 46 (16.2%)                              | 24 (18.2%)                                |                      |
|                                 | 5 <sup>th</sup> quintile | 59  | 33 (11.6%)                              | 26 (19.7%)                                |                      |
| Parental social class           | Professional/managerial  | 278 | 197 (66.3%)                             | 81 (61.8%)                                | 0.369                |
|                                 | other                    | 150 | 100 (33.7%)                             | 50 (38.2%)                                |                      |

<sup>a</sup> Chi-Square test of the association between missing data and categorical exposures  
Numbers vary due to missing data

**eTable 2: Comparison of those with complete and incomplete data on suicide attempts at 21 years (Comparison amongst those with non-suicidal self-harm at baseline, N=569)**

| Variable                        | Description              | N   | Complete data on suicide attempts n=380 | Incomplete data on suicide attempts n=189 | P value <sup>a</sup> |
|---------------------------------|--------------------------|-----|-----------------------------------------|-------------------------------------------|----------------------|
| Child sex                       | Male                     | 116 | 69 (18.2%)                              | 47 (24.9%)                                | 0.061                |
|                                 | Female                   | 453 | 311 (81.8%)                             | 142 (75.1%)                               |                      |
| Parity                          | First born               | 265 | 182 (49.4%)                             | 83(44.9%)                                 | 0.579                |
|                                 | Second born              | 214 | 139 (37.8%)                             | 75 (40.5%)                                |                      |
|                                 | Third born plus          | 74  | 47 (12.8%)                              | 27 (36.5%)                                |                      |
| Home overcrowding               | ≤1 person/room           | 533 | 360 (97.8%)                             | 173(96.1%)                                | 0.248                |
|                                 | >1 person/room           | 15  | 8 (2.2%)                                | 7 (3.9%)                                  |                      |
| Maternal education              | Degree                   | 133 | 91 (24.3%)                              | 42 (23.3%)                                | 0.898                |
|                                 | A level                  | 131 | 91 (24.3%)                              | 40 (22.2%)                                |                      |
|                                 | O level                  | 204 | 134 (35.7%)                             | 70 (38.9%)                                |                      |
|                                 | < O level                | 87  | 59 (15.7%)                              | 28 (15.6%)                                |                      |
| Equivalentised household income | 1 <sup>st</sup> quintile | 130 | 86 (24.8%)                              | 44 (25.4%)                                | 0.449                |
|                                 | 2 <sup>nd</sup> quintile | 117 | 85 (24.5%)                              | 32 (18.5%)                                |                      |
|                                 | 3 <sup>rd</sup> quintile | 113 | 70 (20.2%)                              | 43 (24.9%)                                |                      |
|                                 | 4 <sup>th</sup> quintile | 90  | 62 (17.9%)                              | 28 (16.2%)                                |                      |
|                                 | 5 <sup>th</sup> quintile | 70  | 44 (12.7%)                              | 26 (15.0%)                                |                      |
| Parental social class           | Professional/managerial  | 349 | 239 (65.8%)                             | 110(64.7%)                                | 0.797                |
|                                 | other                    | 184 | 124 (34.2%)                             | 60 (35.3%)                                |                      |

<sup>a</sup> Chi-Square test of the association between missing data and categorical exposures  
Numbers vary due to missing data

**eTable 3: Comparison of responders and non-responders to the self-harm questionnaire at 16 years by key demographic variables (Comparison amongst those invited to participate in the age 16 year questionnaire, N=9,370)**

| Variable                     | Description              | N     | No data on suicidal thoughts and attempts <sup>a</sup> | Data on suicidal thoughts and attempts | P value <sup>b</sup> |
|------------------------------|--------------------------|-------|--------------------------------------------------------|----------------------------------------|----------------------|
| Child sex                    | Male                     | 4,628 | 2,672 (58.1%)                                          | 1,956 (41.0%)                          | <0.001               |
|                              | Female                   | 4,742 | 1,956 (41.9%)                                          | 2,816 (59.0%)                          |                      |
| Parity                       | First born               | 4,060 | 1,789 (41.5%)                                          | 2,271 (48.8%)                          | <0.001               |
|                              | Second born              | 3,199 | 1,571 (36.5%)                                          | 1,628 (35.0%)                          |                      |
|                              | Third born plus          | 1,700 | 948 (22.0%)                                            | 752 (16.2%)                            |                      |
| Home overcrowding            | ≤1 person/room           | 8,434 | 3,994 (93.1%)                                          | 4,440 (96.6%)                          | <0.001               |
|                              | >1 person/room           | 453   | 296 (6.9%)                                             | 157 (3.4%)                             |                      |
| Maternal education           | Degree                   | 1,306 | 365 (8.7%)                                             | 941 (20.2%)                            | <0.001               |
|                              | A level                  | 2,206 | 906 (21.5%)                                            | 1,300 (28.0%)                          |                      |
|                              | O level                  | 3,106 | 1,561 (37.0%)                                          | 1,545 (33.2%)                          |                      |
|                              | < O level                | 2,246 | 1,383 (32.8%)                                          | 863 (18.6%)                            |                      |
| Equivalised household income | 1 <sup>st</sup> quintile | 1,724 | 599 (16.7%)                                            | 1,125 (25.9%)                          | <0.001               |
|                              | 2 <sup>nd</sup> quintile | 1,657 | 651 (18.2%)                                            | 1,006 (23.1%)                          |                      |
|                              | 3 <sup>rd</sup> quintile | 1,612 | 753 (21.0%)                                            | 859 (19.8%)                            |                      |
|                              | 4 <sup>th</sup> quintile | 1,519 | 762 (21.3%)                                            | 757 (17.4%)                            |                      |
|                              | 5 <sup>th</sup> quintile | 1,417 | 818 (22.8%)                                            | 599 (13.8%)                            |                      |
| Parental social class        | Professional/managerial  | 4,870 | 1,979 (50.6%)                                          | 2,891 (64.9%)                          | <0.001               |
|                              | other                    | 3,499 | 1,933 (49.4%)                                          | 1,566 (35.1%)                          |                      |

<sup>a</sup> Includes those who were sent but did not return the self-harm questionnaire, and those who returned the questionnaire but did not respond to the suicidal thoughts or attempts items

<sup>b</sup> Chi-Square test of the association between missing data and categorical exposures

Numbers vary due to missing data

**eTable 4: Predictors of incident suicide attempts amongst those with suicidal thoughts at baseline: Comparison of complete case and imputed data**

| Exposure                                              | Complete case<br>n=310                     |         | Imputed sample<br>n=456                    |         |
|-------------------------------------------------------|--------------------------------------------|---------|--------------------------------------------|---------|
|                                                       | Adjusted for sex and<br>SES<br>OR (95% CI) | P value | Adjusted for sex and<br>SES<br>OR (95% CI) | P value |
| Female sex                                            | 0.85 (0.37, 1.96)                          | 0.698   | 1.01 (0.47, 2.18)                          | 0.975   |
| <b>Psychosocial variables</b>                         |                                            |         |                                            |         |
| IQ                                                    | 0.91 (0.58, 1.42)                          | 0.678   | 0.92 (0.60, 1.42)                          | 0.716   |
| Executive function                                    |                                            |         |                                            |         |
| <i>Updating</i>                                       | 0.89 (0.57, 1.39)                          | 0.616   | 0.94 (0.64, 1.37)                          | 0.742   |
| <i>Attentional-switching</i>                          | 1.08 (0.74, 1.58)                          | 0.700   | 0.99 (0.68, 1.45)                          | 0.968   |
| <i>Attentional-control</i>                            | 1.36 (0.85, 2.18)                          | 0.203   | 1.11 (0.81, 1.51)                          | 0.528   |
| Impulsivity                                           | 0.88 (0.60, 1.31)                          | 0.537   | 0.80 (0.56, 1.15)                          | 0.228   |
| Sensation-seeking                                     |                                            |         |                                            |         |
| <i>Arnett intensity subscale</i>                      | 1.12 (0.76, 1.66)                          | 0.555   | 1.20 (0.85, 1.70)                          | 0.290   |
| <i>Arnett novelty subscale</i>                        | 1.13 (0.77, 1.66)                          | 0.539   | 1.27 (0.88, 1.82)                          | 0.201   |
| Big-5 personality dimensions                          |                                            |         |                                            |         |
| <i>Extraversion</i>                                   | 0.84 (0.53, 1.32)                          | 0.981   | 1.00 (0.68, 1.47)                          | 0.992   |
| <i>Agreeableness</i>                                  | 1.08 (0.65, 1.78)                          | 0.776   | 1.08 (0.73, 1.59)                          | 0.693   |
| <i>Conscientiousness</i>                              | 1.01 (0.64, 1.58)                          | 0.981   | 0.90 (0.59, 1.38)                          | 0.639   |
| <i>Emotional stability</i>                            | 0.96 (0.60, 1.54)                          | 0.874   | 0.91 (0.60, 1.38)                          | 0.657   |
| <i>Intellect/openness</i>                             | 1.56 (0.95, 2.54)                          | 0.076   | 1.62 (1.06, 2.46)                          | 0.025   |
| Family self-harm                                      | 2.46 (1.02, 5.93)                          | 0.045   | 2.03 (0.93, 4.44)                          | 0.076   |
| Friend self-harm                                      | 1.77 (0.79, 3.98)                          | 0.166   | 1.85 (0.93, 3.69)                          | 0.081   |
| Life events                                           | 0.80 (0.55, 1.19)                          | 0.271   | 0.90 (0.65, 1.24)                          | 0.511   |
| Early adversity                                       | 0.81 (0.32, 2.09)                          | 0.668   | 0.75 (0.31, 1.81)                          | 0.513   |
| Body dissatisfaction                                  | 0.94 (0.41, 2.15)                          | 0.880   | 0.95 (0.45, 1.98)                          | 0.883   |
| Sleep problems                                        |                                            |         |                                            |         |
| <i>Waking in the night</i>                            | 1.14 (0.47, 2.73)                          | 0.776   | 1.05 (0.51, 2.18)                          | 0.895   |
| <i>Insufficient sleep</i>                             | 0.47 (0.19, 1.12)                          | 0.088   | 0.59 (0.25, 1.39)                          | 0.224   |
| <b>Psychiatric/mental health variables</b>            |                                            |         |                                            |         |
| Any DAWBA diagnosis                                   | 1.07 (0.28, 4.10)                          | 0.927   | 1.12 (0.35, 3.63)                          | 0.844   |
| Hopelessness                                          | 2.20 (0.99, 4.87)                          | 0.052   | 1.65 (0.85, 3.18)                          | 0.137   |
| Depressive symptoms                                   | 1.11 (0.74, 1.65)                          | 0.612   | 1.06 (0.74, 1.51)                          | 0.754   |
| Substance use                                         |                                            |         |                                            |         |
| <i>Alcohol, heavy drinking</i>                        | 1.37 (0.49, 3.81)                          | 0.543   | 1.11 (0.43, 2.83)                          | 0.830   |
| <i>Cannabis, at least occasional use</i>              | 2.99 (1.01, 8.81)                          | 0.047   | 2.61 (1.11, 6.14)                          | 0.029   |
| <i>Smoking, at least weekly</i>                       | 1.85 (0.54, 6.42)                          | 0.330   | 1.70 (0.58, 4.97)                          | 0.333   |
| <i>Illicit drug use (post year)</i>                   | 3.45 (1.29, 9.24)                          | 0.014   | 2.47 (1.02, 5.96)                          | 0.045   |
| Suicidal plans                                        | 1.58 (0.49, 5.11)                          | 0.448   | 1.15 (0.39, 3.41)                          | 0.800   |
| NSSH                                                  | 3.73 (1.71, 8.12)                          | 0.001   | 2.78 (1.35, 5.74)                          | 0.006   |
| NSSH frequency                                        |                                            |         |                                            |         |
| <i>Not in the last year</i>                           | (reference)                                | 0.561   | (reference)                                | 0.517   |
| <i>1-5 times</i>                                      | 0.59 (0.16, 2.14)                          |         | 0.53 (0.18, 1.58)                          |         |
| <i>6+ times</i>                                       | 1.26 (0.32, 5.00)                          |         | 0.92 (0.26, 3.26)                          |         |
| NSSH method used during most recent self-harm episode |                                            |         |                                            |         |
| <i>Cutting</i>                                        | (reference)                                | 0.049   | (reference)                                | 0.107   |
| <i>Other</i>                                          | 0.29 (0.05, 1.59)                          |         | 0.44 (0.11, 1.83)                          |         |
| <i>Multiple methods</i>                               | 0.14 (0.02, 1.25)                          |         | 0.15 (0.02, 1.16)                          |         |

NSSH: non-suicidal self-harm

The number of individuals with missing data was 0 for gender; 58 for IQ; 60 for updating; 69 for attentional switching; 52 for attentional control; 66 for impulsivity; 5 for sensation seeking; 74 for extraversion; 77 for agreeableness; 81 for conscientiousness; 84 for emotional stability; 78 for intellect/openness; 37 for family self-harm; 0 for friend self-harm; 0 for life events; 115 for adversity; 74 for body dissatisfaction; 110 for waking in

the night; 90 for insufficient sleep; 74 for psychiatric disorder; 15 for hopelessness; 4 for depressive symptoms; 81 for alcohol; 77 for cannabis; 106 for smoking; 84 for illicit drug use; 29 for suicidal plans; 0 for NSSH

**eTable 5: Predictors of incident suicide attempts amongst those with non-suicidal self-harm at baseline: Comparison of complete case and imputed data**

| Exposure                                              | Complete case<br>n=380                     |         | Imputed sample<br>n=569                    |         |
|-------------------------------------------------------|--------------------------------------------|---------|--------------------------------------------|---------|
|                                                       | Adjusted for sex and<br>SES<br>OR (95% CI) | P value | Adjusted for sex and<br>SES<br>OR (95% CI) | P value |
| Female sex                                            | 0.68 (0.30, 1.54)                          | 0.354   | 0.82 (0.39, 1.72)                          | 0.596   |
| <b>Psychosocial variables</b>                         |                                            |         |                                            |         |
| IQ                                                    | 1.03 (0.69, 1.53)                          | 0.892   | 0.99 (0.67, 1.46)                          | 0.944   |
| Executive function                                    |                                            |         |                                            |         |
| <i>Updating</i>                                       | 0.90 (0.61, 1.32)                          | 0.583   | 0.90 (0.64, 1.27)                          | 0.552   |
| <i>Attentional-switching</i>                          | 0.96 (0.66, 1.40)                          | 0.836   | 0.98 (0.65, 1.48)                          | 0.931   |
| <i>Attentional-control</i>                            | 0.94 (0.66, 1.33)                          | 0.715   | 1.02 (0.74, 1.42)                          | 0.886   |
| Impulsivity                                           | 1.04 (0.71, 1.52)                          | 0.836   | 0.92 (0.64, 1.34)                          | 0.670   |
| Sensation-seeking                                     |                                            |         |                                            |         |
| <i>Arnett intensity subscale</i>                      | 0.92 (0.65, 1.31)                          | 0.652   | 0.97 (0.72, 1.31)                          | 0.848   |
| <i>Arnett novelty subscale</i>                        | 0.97 (0.70, 1.36)                          | 0.862   | 1.06 (0.79, 1.40)                          | 0.711   |
| Big-5 personality dimensions                          |                                            |         |                                            |         |
| <i>Extraversion</i>                                   | 0.58 (0.39, 0.87)                          | 0.008   | 0.71 (0.49, 1.03)                          | 0.068   |
| <i>Agreeableness</i>                                  | 1.01 (0.69, 1.49)                          | 0.943   | 1.04 (0.73, 1.47)                          | 0.837   |
| <i>Conscientiousness</i>                              | 1.01 (0.69, 1.48)                          | 0.970   | 0.95 (0.70, 1.31)                          | 0.773   |
| <i>Emotional stability</i>                            | 0.84 (0.57, 1.25)                          | 0.397   | 0.79 (0.53, 1.17)                          | 0.237   |
| <i>Intellect/openness</i>                             | 1.12 (0.77, 1.63)                          | 0.545   | 1.25 (0.87, 1.81)                          | 0.221   |
| Family self-harm                                      | 1.68 (0.75, 3.76)                          | 0.206   | 1.42 (0.66, 3.05)                          | 0.364   |
| Friend self-harm                                      | 0.96 (0.45, 2.06)                          | 0.924   | 0.97 (0.50, 1.89)                          | 0.936   |
| Life events                                           | 0.98 (0.70, 1.36)                          | 0.887   | 1.09 (0.80, 1.49)                          | 0.573   |
| Early adversity                                       | 0.92 (0.38, 2.21)                          | 0.853   | 1.14 (0.56, 2.35)                          | 0.712   |
| Body dissatisfaction                                  | 0.66 (0.32, 1.36)                          | 0.257   | 0.63 (0.33, 1.23)                          | 0.176   |
| Sleep problems                                        |                                            |         |                                            |         |
| <i>Waking in the night</i>                            | 2.06 (0.92, 4.58)                          | 0.077   | 1.91 (0.95, 3.84)                          | 0.069   |
| <i>Insufficient sleep</i>                             | 1.87 (0.90, 3.89)                          | 0.094   | 1.97 (1.02, 3.81)                          | 0.043   |
| <b>Psychiatric/mental health variables</b>            |                                            |         |                                            |         |
| Any DAWBA diagnosis                                   | 0.62 (0.13, 2.89)                          | 0.547   | 0.54 (0.13, 2.30)                          | 0.403   |
| Hopelessness                                          | 1.27 (0.61, 2.66)                          | 0.525   | 1.20 (0.60, 2.40)                          | 0.603   |
| Depressive symptoms                                   | 0.98 (0.71, 1.37)                          | 0.923   | 1.00 (0.73, 1.38)                          | 0.996   |
| Substance use                                         |                                            |         |                                            |         |
| <i>Alcohol, heavy drinking</i>                        | 0.80 (0.35, 1.82)                          | 0.591   | 0.77 (0.38, 1.54)                          | 0.452   |
| <i>Cannabis, at least occasional use</i>              | 2.30 (1.01, 5.23)                          | 0.047   | 2.14 (1.04, 4.41)                          | 0.038   |
| <i>Smoking, at least weekly</i>                       | 1.98 (0.73, 5.38)                          | 0.178   | 2.07 (0.83, 5.13)                          | 0.116   |
| <i>illicit drug use (past year)</i>                   | 2.39 (1.11, 5.18)                          | 0.026   | 2.17 (1.10, 4.27)                          | 0.025   |
| Suicidal plans                                        | 2.18 (0.56, 8.56)                          | 0.263   | 2.25 (0.62, 8.12)                          | 0.215   |
| NSSH frequency                                        |                                            |         |                                            |         |
| <i>Not in the last year</i>                           | (reference)                                | 0.711   | (reference)                                | 0.599   |
| <i>1-5 times</i>                                      | 1.03 (0.49, 2.16)                          |         | 0.83 (0.44, 1.58)                          |         |
| <i>6+ times</i>                                       | 1.46 (0.59, 3.64)                          |         | 1.29 (0.57, 2.92)                          |         |
| NSSH method used during most recent self-harm episode |                                            |         |                                            |         |
| <i>Cutting</i>                                        | (reference)                                | 0.191   | (reference)                                | 0.554   |
| <i>Other</i>                                          | 0.47 (0.16, 1.42)                          |         | 0.67 (0.27, 1.65)                          |         |
| <i>More than one</i>                                  | 0.42 (0.10, 1.85)                          |         | 0.66 (0.22, 1.99)                          |         |

NSSH: non-suicidal self-harm

The number of individuals with missing data was 0 for gender; 56 for IQ; 59 for updating; 75 for attentional switching; 64 for attentional control; 72 for impulsivity; 4 for intensity seeking; 9 for novelty seeking; 82 for extraversion; 83 for agreeableness; 84 for conscientiousness; 89 for emotional stability; 87 for intellect/openness; 37 for family self-harm; 3 for friend self-harm; 0 for life events; 136 for adversity; 50 for body dissatisfaction; 113 for waking in the night; 103 for insufficient sleep; 74 for psychiatric disorder; 17 for hopelessness; 2 for depressive symptoms; 80 for alcohol; 75 for cannabis; 121 for smoking; 86 for illicit drug use; 2 for suicidal plans; 5 for NSSH frequency; 4 for NSSH method.

**eTable 6: Description of risk factors in the subsample with no suicidal thoughts or attempts at age 16 years: complete case sample**

| Exposure (age of assessment)               | Number (%)<br>or Mean (SD) |
|--------------------------------------------|----------------------------|
|                                            | <b>n=2283</b>              |
| Female sex, (%)                            | 57.16%                     |
| <b>Psychosocial variables</b>              |                            |
| Total IQ (age 8, mean (SD))                | 109.3 (15.86)              |
| Executive function, mean (SD)              |                            |
| <i>Updating</i>                            | 13.4 (2.94)                |
| <i>Attentional-switching</i>               | 11.1 (15.10)               |
| <i>Attentional-control</i>                 | 16.9 (5.28)                |
| Impulsivity, mean (SD)                     | 13.7 (2.54)                |
| Sensation-seeking, mean (SD)               |                            |
| <i>Arnett intensity subscale</i>           | 25.5 (4.43)                |
| <i>Arnett novelty subscale</i>             | 25.7 (4.28)                |
| Big-5 personality dimensions, mean (SD)    |                            |
| <i>Extraversion</i>                        | 34.8 (6.97)                |
| <i>Agreeableness</i>                       | 38.5 (4.97)                |
| <i>Conscientiousness</i>                   | 33.1 (5.77)                |
| <i>Emotional stability</i>                 | 33.0 (6.27)                |
| <i>Intellect/openness</i>                  | 36.4 (5.47)                |
| Family self-harm, (%)                      | 5.76%                      |
| Friend self-harm, (%)                      | 30.5%                      |
| Life events, mean (SD)                     | 2.6 (1.89)                 |
| Early adversity, (%)                       | 24.4%                      |
| Body dissatisfaction, (%)                  | 28.5%                      |
| Sleep problems, (%)                        |                            |
| <i>Waking in the night</i>                 | 38.5%                      |
| <i>Insufficient sleep</i>                  | 31.8%                      |
| <b>Psychiatric/mental health variables</b> |                            |
| Any DAWBA diagnosis, (%)                   | 2.6%                       |
| Hopelessness, (%)                          | 9.2%                       |
| Depressive symptoms, mean (SD)             | 4.3 (4.13)                 |
| Substance use, (%)                         |                            |
| <i>Alcohol, heavy drinking</i>             | 15.2%                      |
| <i>Cannabis, at least occasional use</i>   | 5.3%                       |
| <i>Smoking, at least weekly</i>            | 5.1%                       |
| <i>illicit drug use (post year)</i>        | 7.5%                       |
| Suicidal plans, (%)                        | 0%                         |

Sample includes 2283 with data on suicidal thoughts and non-suicidal self-harm at 16 years, and suicidal attempts at age 21 years

The number of individuals with missing data was 0 for gender; 372 for IQ; 411 for updating; 438 for attentional switching; 416 for attentional control; 447 for impulsivity; 58 for intensity seeking; 55 for novelty seeking; 483 for extraversion; 521 for agreeableness; 573 for conscientiousness; 532 for emotional stability; 515 for intellect/openness; 199 for family self-harm; 10 for friend self-harm; 2 for life events; 852 for adversity; 292 for body dissatisfaction; 670 for waking in the night; 606 for insufficient sleep; 481 for psychiatric disorder; 81 for hopelessness; 43 for depressive symptoms; 547 for alcohol; 502 for cannabis; 746 for smoking; 580 for illicit drug use; 0 for suicidal plans



**eTable 7: Predictors of incident suicide attempts amongst those with non-suicidal self-harm at baseline: Sensitivity analysis removing those who reported having self-poisoned on the most recent self-harm occasion**

| Exposure                                              | Complete case<br>n=380                     |         |
|-------------------------------------------------------|--------------------------------------------|---------|
|                                                       | Adjusted for sex and<br>SES<br>OR (95% CI) | P value |
| Female sex                                            | 0.67 (0.29, 1.53)                          | 0.338   |
| <b>Psychosocial variables</b>                         |                                            |         |
| IQ                                                    | 1.07 (0.71, 1.62)                          | 0.736   |
| Executive function                                    |                                            |         |
| <i>Updating</i>                                       | 0.95 (0.65, 1.38)                          | 0.779   |
| <i>Attentional-switching</i>                          | 0.93 (0.62, 1.41)                          | 0.746   |
| <i>Attentional-control</i>                            | 0.96 (0.67, 1.37)                          | 0.816   |
| Impulsivity                                           | 1.00 (0.69, 1.46)                          | 0.995   |
| Sensation-seeking                                     |                                            |         |
| <i>Arnett intensity subscale</i>                      | 0.91 (0.64, 1.29)                          | 0.593   |
| <i>Arnett novelty subscale</i>                        | 1.02 (0.72, 1.43)                          | 0.919   |
| Big-5 personality dimensions                          |                                            |         |
| <i>Extraversion</i>                                   | 0.60 (0.40, 0.89)                          | 0.012   |
| <i>Agreeableness</i>                                  | 1.01 (0.68, 1.50)                          | 0.951   |
| <i>Conscientiousness</i>                              | 0.97 (0.66, 1.42)                          | 0.861   |
| <i>Emotional stability</i>                            | 0.88 (0.60, 1.32)                          | 0.550   |
| <i>Intellect/openness</i>                             | 1.17 (0.80, 1.71)                          | 0.428   |
| Family self-harm                                      | 1.80 (0.80, 4.05)                          | 0.157   |
| Friend self-harm                                      | 1.08 (0.49, 2.39)                          | 0.835   |
| Life events                                           | 1.00 (0.72, 1.40)                          | 0.999   |
| Early adversity                                       | 1.01 (0.42, 2.46)                          | 0.982   |
| Body dissatisfaction                                  | 0.59 (0.28, 1.25)                          | 0.172   |
| Sleep problems                                        |                                            |         |
| <i>Waking in the night</i>                            | 1.93 (0.86, 4.31)                          | 0.109   |
| <i>Insufficient sleep</i>                             | 2.09 (0.99, 4.41)                          | 0.001   |
| <b>Psychiatric/mental health variables</b>            |                                            |         |
| Any DAWBA diagnosis                                   | 0.63 (0.13, 2.92)                          | 0.553   |
| Hopelessness                                          | 1.19 (0.65, 2.91)                          | 0.401   |
| Depressive symptoms                                   | 0.99 (0.71, 1.38)                          | 0.937   |
| Substance use                                         |                                            |         |
| <i>Alcohol, heavy drinking</i>                        | 0.83 (0.37, 1.92)                          | 0.668   |
| <i>Cannabis, at least occasional use</i>              | 2.58 (1.12, 5.92)                          | 0.026   |
| <i>Smoking, at least weekly</i>                       | 2.13 (0.78, 5.77)                          | 0.139   |
| <i>illicit drug use (post year)</i>                   | 2.52 (1.15, 5.50)                          | 0.020   |
| Suicidal plans                                        | 2.15 (0.55, 8.46)                          | 0.273   |
| NSSH frequency                                        |                                            |         |
| <i>Not in the last year</i>                           | (reference)                                | 0.718   |
| <i>1-5 times</i>                                      | 1.06 (0.50, 2.24)                          |         |
| <i>6+ times</i>                                       | 1.47 (0.58, 3.69)                          |         |
| NSSH method used during most recent self-harm episode |                                            |         |
| <i>Cutting</i>                                        | (reference)                                | 0.207   |
| <i>Other</i>                                          | 0.39 (0.11, 1.38)                          |         |
| <i>More than one</i>                                  | 0.53 (0.12, 2.37)                          |         |

NSSH: non-suicidal self-harm
